# Supplementary material for: Preliminary Report: US Physician Stress During the Early Days of the COVID-19 Pandemic
Source: PubMed Central journal article supplement — Mayo Clin Proc Innov Qual Outcomes. 2021 Feb 2;5(1):127–36. doi: 10.1016/j.mayocpiqo.2021.01.005 (PMC7930845; doi:10.1016/j.mayocpiqo.2021.01.005), 2021-02-02
Supplement: mmc2.pdf [file mmc2.pdf]

Table 1A. Intercorrelation matrix of four items of stress summary score

Correlation matrix for Stress Scale (N = 2373)

|           | Stress | Worry  | Anxiety | Work load |
|-----------|--------|--------|---------|-----------|
| Stress    | 1.000  |        |         |           |
| Worry     | 0.3871 | 1.000  |         |           |
| Anxiety   | 0.5146 | 0.4120 | 1.000   |           |
| Work load | 0.4976 | 0.2400 | 0.3502  | 1.000     |

All correlations significant at  $p < 0.001$
